# Supplementary material
Source: Springer Nature journal article supplement (https://www.springermedizin.de/resource/supplementary/12873_2013_206_MOESM1_ESM.pdf/9431652)

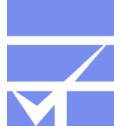

## CONSORT 2010 Flow Diagram

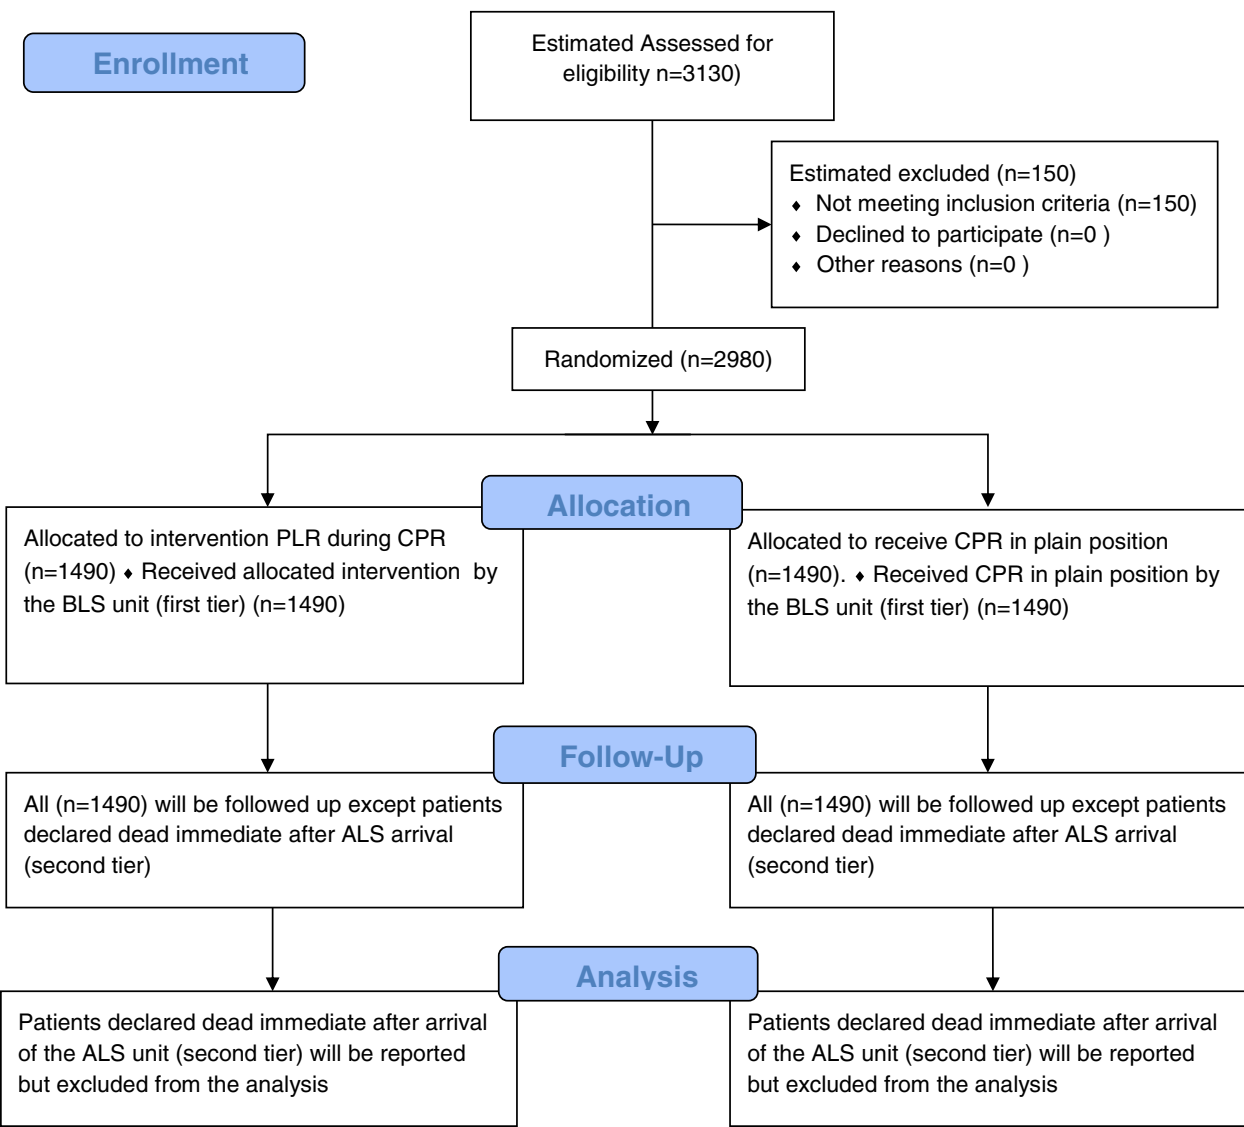

Supplement: MOESM1 [file 9431652]
